# Supplementary material for: Synthesis, Characterization, and Catalytic Activity of Nickel Sulfided Catalysts for the Dehydrogenation of Propane: Effect of Sulfiding Agent and Sulfidation Temperature
Source: MDPI journal article supplement (doi:10.3390/catal12050483), 2022-04-25
Supplement: s1 [file s1]

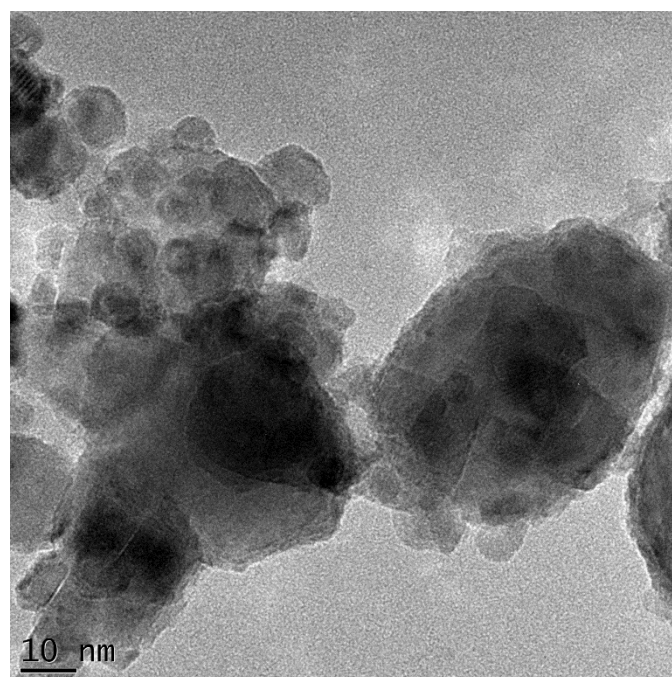

**Figure S1.** TEM image of unmodified Ni/MgAl<sub>2</sub>O<sub>4</sub>.

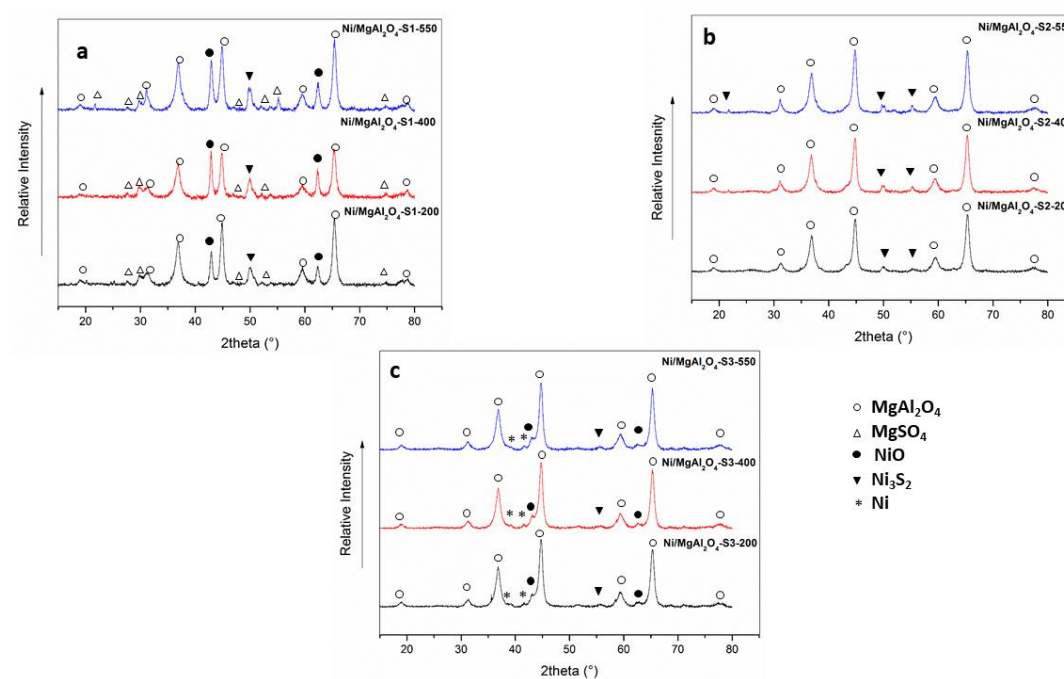

**Figure S2.** XRD analysis of spent catalysts.

**Table S1.** Crystallite size of spent catalysts.

| <b>Catalyst</b>                             | <b>Crystallite size Ni<sub>3</sub>S<sub>2</sub> (nm)</b> |
|---------------------------------------------|----------------------------------------------------------|
| Ni/MgAl <sub>2</sub> O <sub>4</sub> -S1-200 | 14                                                       |
| Ni/MgAl <sub>2</sub> O <sub>4</sub> -S1-400 | 19                                                       |
| Ni/MgAl <sub>2</sub> O <sub>4</sub> -S1-550 | 20                                                       |
| Ni/MgAl <sub>2</sub> O <sub>4</sub> -S2-200 | 11                                                       |
| Ni/MgAl <sub>2</sub> O <sub>4</sub> -S2-400 | 18                                                       |
| Ni/MgAl <sub>2</sub> O <sub>4</sub> -S2-550 | 15                                                       |
| Ni/MgAl <sub>2</sub> O <sub>4</sub> -S3-200 | 11                                                       |
| Ni/MgAl <sub>2</sub> O <sub>4</sub> -S3-400 | 14                                                       |
| Ni/MgAl <sub>2</sub> O <sub>4</sub> -S3-550 | 20                                                       |
